# Supplementary material for: Electrochemical Pourbaix diagrams of Mg–Zn alloys from first-principles calculations and experimental thermodynamic data
Source: Royal Society of Chemistry journal article supplement (doi:10.1039/d1cp02754a), 2021-01-01
Supplement: d1cp02754a1.pdf [file d1cp02754a1.pdf]

# Supporting Information for ‘Electrochemical Pourbaix diagrams of Mg-Zn alloys from first-principles calculations and experimental thermodynamical data’

Xinxin Dong,<sup>ab</sup> Bo Wei,<sup>ab</sup> Dominik Legut,<sup>c</sup> Haijun Zhang,<sup>\*de</sup> and Ruifeng Zhang<sup>\*ab</sup>

---

<sup>a</sup> School of Materials Science and Engineering, Beihang University, Beijing 100191, P. R. China

<sup>b</sup> Center for Integrated Computational Materials Engineering (International Research Institute for Multidisciplinary Science) and Key Laboratory of High-Temperature Structural Materials & Coatings Technology (Ministry of Industry and Information Technology), Beihang University, Beijing 100191, P. R. China

<sup>c</sup> *IT4Innovations Center, VSB-Technical University of Ostrava, CZ-70833 Ostrava, Czech Republic*

<sup>d</sup> National United Engineering Laboratory for Biomedical Material Modification, Dezhou, Shandong 251100, China

<sup>e</sup> *Department of Vascular & Intervention, Tenth Peoples' Hospital of Tongji University, Shanghai, 200072, China*

† Corresponding author:

[zrf@buaa.edu.cn](mailto:zrf@buaa.edu.cn) (Ruifeng Zhang), [zhanghaijun@tongji.edu.cn](mailto:zhanghaijun@tongji.edu.cn) (Haijun Zhang)

**Table S1.** Calculated lattice constants, formation energies, and volume per atom of partial results of the high-throughput of Mg-Zn alloys from the Inorganic Crystal Structure Database (ICSD) prototype library<sup>1</sup>.

|                                  | Lattice constants/ Å |        |        | Formation energy/meV | Volume per atom/Å <sup>3</sup> | ICSD number | Pearson symbol |
|----------------------------------|----------------------|--------|--------|----------------------|--------------------------------|-------------|----------------|
|                                  | a                    | b      | c      |                      |                                |             |                |
| MgZn                             | 3.189                | 4.403  | 5.44   | -93.311              | 18.465                         | 56541       | mP4            |
|                                  | 10.189               | 10.189 | 5.722  | -93.009              | 18.565                         | 78364       | tI32           |
|                                  | 5.426                | 10.455 | 5.426  | -93.59               | 18.341                         | 104584      | mP16           |
|                                  | 6.44                 | 8.748  | 5.472  | -96.413              | 18.482                         | 167597      | mS16           |
|                                  | 5.383                | 10.624 | 5.118  | -85.932              | 18.295                         | 57734       | oP16           |
|                                  | 12.051               | 4.392  | 5.562  | -91.754              | 18.401                         | 58358       | oP16           |
|                                  | 10.203               | 10.203 | 5.71   | -92.928              | 18.575                         | 78364       | tI32           |
|                                  | 5.41                 | 10.436 | 5.425  | -95.148              | 18.407                         | 104584      | mP16           |
| MgZn <sub>2</sub>                | 5.217                | 5.217  | 5.217  | -123.821             | 16.803                         | 2351        | hR6            |
|                                  | 5.218                | 7.396  | 5.209  | -122.623             | 16.751                         | 2459        | oP12           |
|                                  | 5.218                | 7.396  | 5.209  | -122.623             | 16.751                         | 28383       | hP39           |
|                                  | 7.378                | 7.378  | 7.378  | -124.393             | 16.732                         | 103048      | cF24           |
|                                  | 5.212                | 5.212  | 16.904 | -127.764             | 16.567                         | 104838      | hP24           |
|                                  | 5.217                | 5.217  | 8.57   | -130.758             | 16.832                         | 104897      | hP12           |
|                                  | 5.222                | 9.036  | 8.566  | -129.656             | 16.841                         | 105898      | oS24           |
|                                  | 7.628                | 7.628  | 3.082  | -92.481              | 17.258                         | 151889      | hP9            |
|                                  | 5.223                | 5.223  | 7.401  | -123.104             | 16.824                         | 154731      | tI12           |
|                                  | 5.216                | 5.213  | 7.4    | -123.09              | 16.767                         | 154737      | oI12           |
| Mg <sub>2</sub> Zn               | 6.758                | 6.758  | 5.272  | -72.607              | 20.065                         | 642         | tI12           |
|                                  | 6.768                | 6.768  | 5.273  | -72.417              | 20.13                          | 30446       | tI12           |
|                                  | 5.418                | 5.418  | 14.23  | -69.001              | 20.096                         | 30713       | hP18           |
|                                  | 6.736                | 6.736  | 5.301  | -73.206              | 20.042                         | 42518       | tI12           |
|                                  | 4.557                | 5.982  | 8.698  | -60.529              | 19.758                         | 44507       | mP12           |
|                                  | 7.907                | 7.907  | 3.255  | -70.419              | 19.581                         | 51974       | hP9            |
|                                  | 5.326                | 6.654  | 6.832  | -72.739              | 20.175                         | 60760       | mP12           |
|                                  | 7.917                | 7.917  | 3.247  | -70.239              | 19.588                         | 70115       | hP9            |
|                                  | 6.63                 | 13.595 | 7.837  | -69.986              | 19.621                         | 82148       | oI36           |
|                                  | 7.829                | 7.829  | 6.667  | -70.766              | 19.663                         | 103790      | hP18           |
| Mg <sub>7</sub> Zn <sub>3</sub>  | 9.458                | 9.458  | 9.458  | -12.262              | 21.154                         | 53656       | cI40           |
|                                  | 9.171                | 16.434 | 5.548  | -12.777              | 20.904                         | 87129       | oP40           |
|                                  | 11.242               | 10.148 | 7.574  | -31.684              | 20.135                         | 102983      | aP40           |
|                                  | 4.515                | 22.342 | 3.949  | -16.816              | 19.922                         | 104134      | oS20           |
|                                  | 5.968                | 8.327  | 10.378 | 308.325              | 25.785                         | 106290      | oS20           |
|                                  | 9.073                | 9.073  | 5.843  | -18.028              | 20.828                         | 107715      | hP20           |
|                                  | 11.199               | 3.5    | 10.403 | 13.124               | 20.342                         | 200243      | mS20           |
|                                  | 13.709               | 12.092 | 10.979 | 78.974               | 22.748                         | 300282      | oS80           |
| Mg <sub>2</sub> Zn <sub>11</sub> | 8.559                | 8.559  | 8.559  | -60.556              | 16.079                         | 104898      | cP39           |

**Table S2.** Formation energies, and volume per atom of partial results of Mg-Zn alloys from the Automatic Flow for Materials Discovery (AFLOW)<sup>2-4</sup>.

| Index | Mg | Zn | Formation energy/meV | Volume per atom/Å <sup>3</sup> | Space group          |
|-------|----|----|----------------------|--------------------------------|----------------------|
| 3     | 1  | 1  | -74.2991             | 17.945                         | P4/mmm               |
| 4     | 1  | 1  | -1.2901              | 18.87                          | R-3m                 |
| 5     | 2  | 1  | -41.8097             | 19.8                           | I4/mmm               |
| 6     | 1  | 2  | -32.5518             | 17.0367                        | I4/mmm               |
| 7     | 2  | 1  | -26.4187             | 19.82                          | Immm                 |
| 8     | 1  | 2  | -28.8995             | 17.0133                        | Immm                 |
| 9     | 2  | 1  | 12.3943              | 20.3667                        | P-3m1                |
| 10    | 1  | 2  | 21.0862              | 17.6767                        | P-3m1                |
| 11    | 3  | 1  | 8.299                | 20.5975                        | Cmmm                 |
| 12    | 1  | 3  | -1.5187              | 16.7175                        | Cmmm                 |
| 13    | 3  | 1  | -27.4415             | 20.56                          | P4/mmm               |
| 14    | 2  | 2  | -18.9114             | 18.535                         | P4/nmm               |
| 15    | 1  | 3  | -7.8907              | 16.57                          | P4/mmm               |
| 16    | 3  | 1  | -3.7278              | 20.685                         | C2/m                 |
| 17    | 2  | 2  | -57.6106             | 18.44                          | C2/m                 |
| 18    | 1  | 3  | -6.8227              | 16.855                         | C2/m                 |
| 19    | 3  | 1  | -6.158               | 20.615                         | Pmmm                 |
| 20    | 2  | 2  | -8.8146              | 18.57                          | Pmmn                 |
| 21    | 1  | 3  | -10.7179             | 16.83                          | Pmmm                 |
| 22    | 3  | 1  | -7.3123              | 20.38                          | I4/mmm               |
| 23    | 2  | 2  | -28.1034             | 18.3975                        | I4 <sub>1</sub> /amd |
| 24    | 1  | 3  | -30.0112             | 16.475                         | I4/mmm               |
| 25    | 3  | 1  | -14.2955             | 20.3675                        | Pm-3m                |
| 26    | 1  | 3  | -41.2949             | 16.41                          | Pm-3m                |
| 27    | 3  | 1  | 16.8517              | 20.9775                        | R-3m                 |
| 28    | 2  | 2  | 34.5699              | 19.2625                        | R-3m                 |
| 29    | 1  | 3  | 29.8078              | 16.995                         | R-3m                 |
| 60    | 1  | 1  | -69.9411             | 18.12                          | P4/mmm               |
| 61    | 1  | 1  | -74.8876             | 17.92                          | Pm-3m                |
| 62    | 2  | 1  | -2.1197              | 19.7967                        | P-3m1                |
| 63    | 1  | 2  | -93.0478             | 17.0733                        | P6/mmm               |
| 66    | 2  | 1  | -40.9504             | 19.79                          | I4/mmm               |
| 67    | 1  | 2  | -25.5888             | 17.2667                        | I4/mmm               |
| 68    | 3  | 1  | 33.102               | 20.6325                        | R-3m                 |
| 69    | 1  | 3  | 40.3888              | 16.8125                        | R-3m                 |
| 70    | 3  | 1  | -25.827              | 20.43                          | P4/mmm               |
| 71    | 2  | 2  | -16.4236             | 18.56                          | P4/nmm               |
| 72    | 1  | 3  | -7.1789              | 16.6425                        | P4/mmm               |
| 73    | 3  | 1  | 4.58                 | 20.5825                        | P2/m                 |
| 74    | 2  | 2  | -97.0801             | 18.5675                        | Cmcm                 |
| 75    | 1  | 3  | -29.2444             | 17.47                          | P2/m                 |
| 76    | 3  | 1  | -12.15               | 20.3925                        | P4/mmm               |

|     |    |    |          |         |                      |
|-----|----|----|----------|---------|----------------------|
| 77  | 2  | 2  | -5.4359  | 18.675  | P4/nmm               |
| 78  | 1  | 3  | -11.0942 | 16.9075 | P4/mmm               |
| 79  | 3  | 1  | -6.781   | 20.4175 | Immm                 |
| 80  | 2  | 2  | -41.7339 | 18.345  | Imma                 |
| 81  | 1  | 3  | -29.9829 | 16.43   | I4/mmm               |
| 82  | 3  | 1  | -15.0268 | 20.4175 | P4/mmm               |
| 83  | 1  | 3  | -40.3372 | 16.4925 | P4/mmm               |
| 84  | 3  | 1  | 13.8905  | 20.13   | Fm-3m                |
| 85  | 2  | 2  | 26.6679  | 17.9275 | Fd-3m                |
| 86  | 1  | 3  | 1.8878   | 16.3725 | Fm-3m                |
| 116 | 1  | 1  | -11.0986 | 18.67   | P-6m2                |
| 118 | 3  | 1  | -4.8445  | 20.51   | Pmm2                 |
| 119 | 2  | 2  | -6.8886  | 18.565  | Pmnm                 |
| 120 | 2  | 2  | -80.8119 | 18.0575 | Pmma                 |
| 121 | 1  | 3  | -17.1749 | 16.6125 | Pmm2                 |
| 122 | 3  | 1  | -10.7923 | 20.645  | Imm2                 |
| 124 | 1  | 3  | -9.9304  | 16.6075 | Imm2                 |
| 125 | 3  | 1  | 1.5405   | 20.76   | P-6m2                |
| 126 | 2  | 2  | 16.7341  | 18.9325 | P-3m1                |
| 127 | 1  | 3  | 19.4561  | 16.8475 | P-6m2                |
| 128 | 5  | 1  | -2.9818  | 21.27   | Cm                   |
| 129 | 2  | 4  | -29.5012 | 17.2033 | C2/m                 |
| 130 | 2  | 4  | -39.0035 | 16.92   | C2/m                 |
| 131 | 2  | 4  | -12.7673 | 17.265  | C2/m                 |
| 132 | 1  | 5  | -0.6669  | 16.08   | Cm                   |
| 133 | 4  | 2  | -7.0604  | 20.0117 | Cm                   |
| 134 | 4  | 2  | -6.3499  | 20.045  | C2/m                 |
| 135 | 4  | 2  | -23.5509 | 19.8783 | C2/m                 |
| 136 | 3  | 3  | -3.2149  | 18.6233 | Cm                   |
| 137 | 4  | 2  | -37.6626 | 19.6067 | C2/m                 |
| 138 | 3  | 3  | -40.7794 | 18.3783 | Cm                   |
| 139 | 3  | 3  | -36.6174 | 18.4383 | Cm                   |
| 140 | 2  | 4  | -9.8587  | 17.3283 | Cm                   |
| 141 | 5  | 1  | 2.0155   | 21.2217 | Amm2                 |
| 142 | 2  | 4  | 17.487   | 17.5983 | Cmcm                 |
| 143 | 2  | 4  | -43.5367 | 16.9533 | Cmcm                 |
| 145 | 1  | 5  | -0.6459  | 16.05   | Amm2                 |
| 147 | 4  | 2  | 3.5044   | 20.16   | Cmcm                 |
| 150 | 4  | 2  | -29.0362 | 19.7033 | Cmcm                 |
| 178 | 8  | 4  | 239.2978 | 21.9525 | P6 <sub>3</sub> /mmc |
| 179 | 4  | 8  | -130.638 | 16.8258 | P6 <sub>3</sub> /mmc |
| 180 | 12 | 4  | -40.2023 | 21.1913 | Pnma                 |
| 181 | 4  | 12 | -15.7086 | 16.6425 | Pnma                 |
| 182 | 2  | 4  | -123.912 | 16.7383 | Fd-3m                |
| 183 | 4  | 2  | 231.8784 | 21.84   | Fd-3m                |
| 184 | 6  | 2  | 3.4536   | 20.5025 | Pm-3n                |
| 185 | 2  | 6  | 22.3577  | 17.2425 | Pm-3n                |
| 186 | 6  | 2  | -35.0873 | 20.1475 | P6 <sub>3</sub> /mmc |
| 187 | 2  | 6  | -57.3641 | 16.3113 | P6 <sub>3</sub> /mmc |

|     |    |    |          |         |            |
|-----|----|----|----------|---------|------------|
| 188 | 4  | 2  | -24.7299 | 19.7117 | Cmcm       |
| 189 | 2  | 4  | -40.7672 | 17.1117 | Cmcm       |
| 190 | 2  | 1  | 12.6533  | 20.4    | P-3m1      |
| 191 | 1  | 2  | 172.7258 | 20.3933 | P-3m1      |
| 192 | 2  | 2  | 53.7599  | 19.3825 | Cmcm       |
| 193 | 2  | 2  | -96.2261 | 18.5175 | Cmcm       |
| 194 | 2  | 2  | -96.3534 | 18.37   | Cmcm       |
| 195 | 4  | 4  | -21.6925 | 18.81   | P2_{1}3    |
| 196 | 2  | 2  | -18.8119 | 18.5975 | P4/nmm     |
| 197 | 2  | 2  | -18.6579 | 18.6325 | P4/nmm     |
| 198 | 12 | 12 | -52.9004 | 18.5579 | Pbcm       |
| 201 | 1  | 1  | 192.0769 | 21.885  | Fm-3m      |
| 202 | 4  | 1  | 266.0914 | 24.142  | I4/mmm     |
| 203 | 1  | 4  | 6.3112   | 17.494  | I4/mmm     |
| 204 | 5  | 1  | 257.1268 | 24.695  | P6/mmm     |
| 205 | 1  | 5  | -7.4907  | 16.8017 | P6/mmm     |
| 208 | 6  | 3  | -70.8162 | 19.6522 | P-62m      |
| 209 | 3  | 6  | 107.6115 | 19.2411 | P-62m      |
| 210 | 4  | 8  | -42.4305 | 17.1267 | Pnma       |
| 211 | 8  | 4  | -60.4917 | 19.68   | Pnma       |
| 216 | 2  | 1  | 127.2326 | 19.8967 | P6/mmm     |
| 217 | 1  | 2  | -93.6202 | 17.09   | P6/mmm     |
| 218 | 1  | 1  | 556.2019 | 30.23   | F-43m      |
| 219 | 2  | 2  | 149.3051 | 20.2975 | P6_{3}mc   |
| 220 | 2  | 2  | 40.0044  | 21.0825 | P6_{3}/mmc |
| 221 | 2  | 2  | -7.6999  | 18.7825 | P6_{3}/mmc |
| 222 | 6  | 10 | 50.1522  | 18.8325 | P6_{3}/mcm |
| 223 | 10 | 6  | -65.8774 | 19.7719 | P6_{3}/mcm |
| 230 | 2  | 4  | 172.4075 | 19.5667 | I4/mcm     |
| 231 | 4  | 2  | -73.0552 | 19.9283 | I4/mcm     |
| 232 | 2  | 1  | -41.9431 | 19.8667 | I4/mmm     |
| 233 | 1  | 2  | -32.7998 | 17.15   | I4/mmm     |
| 234 | 4  | 2  | -73.1132 | 19.9633 | I4/mcm     |
| 235 | 2  | 4  | 172.512  | 19.5367 | I4/mcm     |
| 238 | 18 | 6  | -22.4743 | 20.2662 | P6_{3}/mmc |
| 239 | 6  | 18 | -46.3796 | 16.3829 | P6_{3}/mmc |
| 242 | 18 | 6  | -13.2561 | 20.2787 | Pmmn       |
| 243 | 6  | 18 | -37.8921 | 16.4671 | Pmmn       |
| 244 | 4  | 12 | -48.3597 | 16.4475 | P6_{3}/mmc |
| 245 | 12 | 4  | -26.709  | 20.2869 | P6_{3}/mmc |
| 246 | 4  | 2  | 127.1988 | 20.0467 | P6/mmm     |
| 247 | 2  | 4  | -91.2417 | 17.325  | P6/mmm     |
| 248 | 2  | 4  | 46.3182  | 18.9967 | I4_{1}/amd |
| 249 | 4  | 2  | 14.1663  | 20.7383 | I4_{1}/amd |
| 252 | 5  | 1  | 159.0165 | 22.7217 | F-43m      |
| 253 | 1  | 5  | -14.0665 | 16.2167 | F-43m      |
| 254 | 10 | 6  | -55.8173 | 19.6581 | I4/mcm     |
| 255 | 6  | 10 | 27.8317  | 18.065  | Fmmm       |
| 256 | 4  | 4  | 28.6146  | 19.345  | Pnma       |

|     |    |    |          |         |                      |
|-----|----|----|----------|---------|----------------------|
| 257 | 4  | 2  | -26.5416 | 19.7067 | Immm                 |
| 258 | 2  | 4  | -32.4165 | 17.2267 | Immm                 |
| 259 | 2  | 3  | 11.1447  | 18.164  | R-3m                 |
| 260 | 3  | 2  | 5.3535   | 19.802  | R-3m                 |
| 261 | 16 | 8  | -53.3133 | 19.8967 | Fd-3m                |
| 262 | 8  | 16 | 119.4445 | 18.7079 | Fd-3m                |
| 263 | 4  | 3  | -23.5354 | 19.0771 | I4/mmm               |
| 264 | 3  | 4  | -14.9968 | 17.88   | I4/mmm               |
| 267 | 4  | 2  | -26.5416 | 19.7067 | Immm                 |
| 268 | 2  | 4  | -32.4165 | 17.2267 | Immm                 |
| 269 | 1  | 2  | -92.9428 | 17.2133 | P6/mmm               |
| 270 | 2  | 1  | -2.5914  | 19.9433 | P-3m1                |
| 271 | 6  | 2  | -34.7852 | 20.1325 | P6 <sub>3</sub> /mmc |
| 272 | 2  | 6  | -60.1792 | 16.5437 | Cmcm                 |
| 273 | 2  | 4  | 19.4263  | 17.2967 | P6 <sub>3</sub> /mmc |
| 274 | 4  | 2  | -47.2879 | 19.5483 | P6 <sub>3</sub> /mmc |
| 275 | 2  | 4  | 19.4283  | 17.31   | P6 <sub>3</sub> /mmc |
| 276 | 4  | 2  | -47.2769 | 19.5983 | P6 <sub>3</sub> /mmc |
| 277 | 2  | 6  | -64.5689 | 16.6225 | Pmnn                 |
| 278 | 6  | 2  | -26.9137 | 20.1762 | Pmnn                 |
| 279 | 2  | 6  | -37.4568 | 16.5675 | I4/mmm               |
| 280 | 6  | 2  | -11.7262 | 20.3388 | I4/mmm               |
| 281 | 8  | 4  | 44.7777  | 22.6425 | Fm-3m                |
| 282 | 4  | 8  | 391.1893 | 23.1975 | Pa-3                 |
| 283 | 4  | 8  | 43.9917  | 18.8092 | I4 <sub>1</sub> /amd |
| 284 | 8  | 4  | 18.3892  | 20.75   | Imma                 |
| 285 | 4  | 1  | 71.5694  | 20.75   | I4/m                 |
| 286 | 1  | 4  | -167.741 | 20.75   | I4/m                 |
| 287 | 2  | 1  | -41.2061 | 19.5667 | I4/mmm               |
| 288 | 1  | 2  | -30.9935 | 17.1767 | I4/mmm               |
| 289 | 3  | 1  | 336.9872 | 33.9475 | Pm-3m                |
| 290 | 1  | 3  | 674.9231 | 40.0575 | Pm-3m                |
| 291 | 2  | 2  | -71.7069 | 18.125  | P4/mmm               |
| 292 | 2  | 2  | -74.3829 | 17.9875 | P4/mmm               |
| 309 | 7  | 1  | 15.5919  | 21.8525 | Fm-3m                |
| 310 | 1  | 7  | 8.5862   | 15.93   | Fm-3m                |
| 311 | 1  | 8  | -0.2213  | 15.7144 | I4/mmm               |
| 312 | 8  | 1  | 10.7381  | 21.8489 | I4/mmm               |
| 313 | 5  | 4  | -14.5709 | 18.6478 | I4/mmm               |
| 314 | 4  | 5  | -37.3722 | 17.9222 | I4/mmm               |
| 315 | 16 | 8  | 234.2803 | 21.9788 | P6 <sub>3</sub> /mmc |
| 316 | 8  | 16 | -127.879 | 16.5933 | P6 <sub>3</sub> /mmc |
| 359 | 10 | 8  | -39.2489 | 18.9833 | P6 <sub>3</sub> /mcm |
| 360 | 8  | 10 | -6.0862  | 18.115  | P6 <sub>3</sub> /mcm |
| 363 | 4  | 3  | -66.1374 | 18.9014 | P6/mmm               |
| 364 | 3  | 4  | 99.5963  | 19.6143 | P6/mmm               |
| 365 | 4  | 6  | 88.2006  | 19.6143 | Fdd2                 |
| 366 | 6  | 4  | 167.9708 | 19.6143 | Fdd2                 |
| 371 | 2  | 3  | 98.5919  | 19.952  | P-3m1                |

|     |    |    |          |         |            |
|-----|----|----|----------|---------|------------|
| 372 | 3  | 2  | -40.1521 | 20.266  | P-3m1      |
| 373 | 4  | 16 | 15.6652  | 17.524  | I-43m      |
| 374 | 16 | 4  | 165.141  | 23.569  | I-43m      |
| 375 | 5  | 3  | -43.1044 | 19.2838 | Cmmm       |
| 376 | 3  | 5  | -40.3118 | 17.36   | Cmmm       |
| 381 | 4  | 8  | -42.6608 | 16.9567 | I4_{1}/amd |
| 382 | 8  | 4  | -19.8901 | 19.5908 | I4_{1}/amd |
| 389 | 1  | 2  | 193.9075 | 21.89   | P4/mmm     |
| 390 | 2  | 1  | 44.6616  | 22.4033 | P4/mmm     |
| 405 | 2  | 2  | 26.9189  | 18.165  | I4_{1}/amd |
| 406 | 2  | 2  | -37.0056 | 19.605  | R-3m       |
| 407 | 4  | 4  | 131.3038 | 19.8762 | P6_{3}/mmc |
| 408 | 4  | 4  | -36.2757 | 19.015  | P6_{3}/mmc |
| 447 | 2  | 2  | -74.4029 | 18.2675 | P2_{1}/m   |
| 448 | 2  | 2  | -80.2654 | 18.035  | Pmma       |
| 471 | 2  | 6  | -13.2572 | 16.5162 | Cmcm       |
| 472 | 6  | 2  | -4.1122  | 20.5    | Cmcm       |
| 473 | 1  | 5  | -19.632  | 15.89   | P-62m      |
| 474 | 5  | 1  | -2.3307  | 21.145  | P-62m      |
| 475 | 4  | 2  | -5.6232  | 19.9933 | C2/m       |
| 476 | 2  | 4  | -31.2412 | 17.2167 | C2/m       |
| 477 | 1  | 5  | 8.2926   | 16.035  | P4/mmm     |
| 478 | 5  | 1  | -11.0157 | 21.3817 | P4/mmm     |
| 479 | 5  | 1  | 1.6922   | 21.1583 | Cmmm       |
| 480 | 1  | 5  | -16.7367 | 16.0433 | Cmmm       |
| 521 | 6  | 3  | -70.6545 | 19.5667 | P-62m      |
| 522 | 3  | 6  | 58.7713  | 17.7033 | P-62m      |
| 531 | 1  | 3  | -40.3372 | 16.53   | Pm-3m      |
| 532 | 3  | 1  | -13.9323 | 20.4075 | Pm-3m      |
| 537 | 6  | 6  | -37.3659 | 19.3642 | R-3m       |
| 538 | 6  | 6  | 26.4409  | 18.0258 | R-3m       |
| 539 | 2  | 4  | -42.4902 | 16.98   | C2/m       |
| 540 | 4  | 2  | -40.4962 | 19.6217 | C2/m       |
| 541 | 1  | 3  | -29.1932 | 16.595  | I4/mmm     |
| 542 | 3  | 1  | -6.0335  | 20.6125 | Immm       |
| 543 | 2  | 2  | -41.4496 | 18.41   | Imma       |
| 545 | 2  | 1  | -2.1444  | 20.1367 | P-3m1      |
| 547 | 1  | 2  | -32.5165 | 17.1133 | I4/mmm     |
| 548 | 2  | 1  | -41.9221 | 19.7233 | I4/mmm     |
| 551 | 1  | 3  | -10.0737 | 16.5475 | Imm2       |
| 553 | 6  | 18 | -60.2406 | 16.9546 | P6_{3}/mmc |
| 554 | 18 | 6  | -42.9881 | 20.6604 | P6_{3}cm   |
| 583 | 2  | 1  | 43.2079  | 22.65   | Fm-3m      |
| 584 | 1  | 2  | 240.6392 | 21.14   | Fm-3m      |
| 585 | 2  | 6  | 106.7694 | 18.175  | P6_{3}/mmc |
| 586 | 6  | 2  | -16.201  | 20.815  | P6_{3}/mmc |
| 590 | 6  | 33 | -60.6008 | 16.0651 | Pm-3       |
| 592 | 20 | 35 | -126.791 | 16.8251 | C2/m       |

**Figure S1.** (a) Theoretical bound conditions of corrosion, immunity and passivation of the Mg:Zn = 10:1 system at 298 K; (b) Theoretical conditions of corrosion, immunity and passivation of the Mg:Zn = 10:1 system in Cl-containing solutions at 298 K; (c) Theoretical conditions of corrosion, immunity and passivation of the Mg:Zn = 1:10 system at 298 K; (d) Theoretical conditions of corrosion, immunity and passivation of the Mg:Zn = 1:10 system in Cl-containing solutions at 298 K.

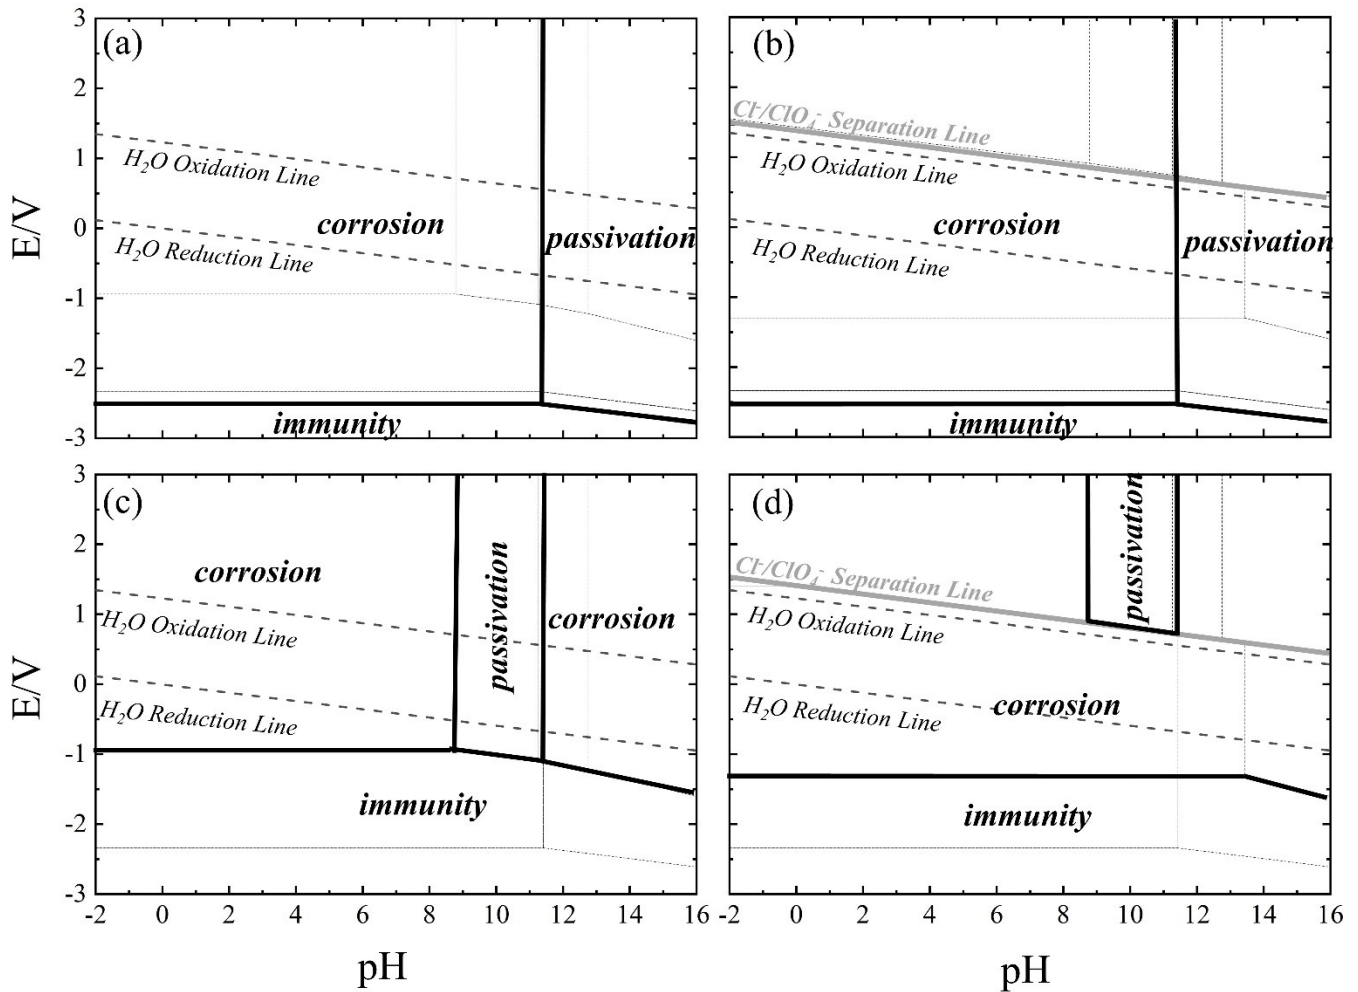



**Figure S2.** (a) Pourbaix diagram of the Mg: Zn = 10:1 system in Cl-containing solution at 298 K; (d) Pourbaix diagram of the Mg: Zn = 1:10 system in Cl-containing solution at 298 K. The different concentrations of Cl- and their corresponding stable domains are marked in the diagrams.

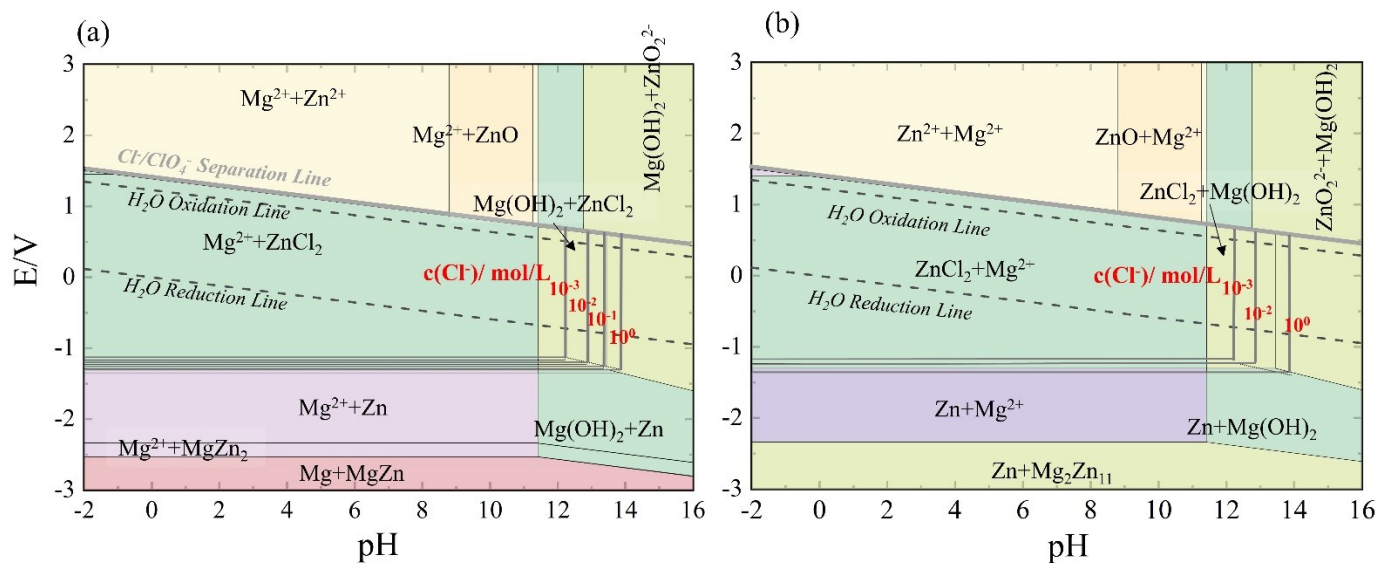

## REFERENCES

- 1 A. Belkly, M. Helderma, V. L. Karen and P. Ulkch, New developments in the Inorganic Crystal Structure Database (ICSD): Accessibility in support of materials research and design, *Acta Crystallogr. Sect. B Struct. Sci.*, 2002, **58**, 364–369.
- 2 S. Curtarolo, W. Setyawan, G. L. W. Hart, M. Jahnatek, R. V. Chepulskii, R. H. Taylor, S. Wang, J. Xue, K. Yang, O. Levy, M. J. Mehl, H. T. Stokes, D. O. Demchenko and D. Morgan, AFLOW: An automatic framework for high-throughput materials discovery, *Comput. Mater. Sci.*, 2012, **58**, 218–226.
- 3 S. Curtarolo, W. Setyawan, S. Wang, J. Xue, K. Yang, R. H. Taylor, L. J. Nelson, G. L. W. Hart, S. Sanvito, M. Buongiorno-Nardelli, N. Mingo and O. Levy, AFLOWLIB.ORG: A distributed materials properties repository from high-throughput ab initio calculations, *Comput. Mater. Sci.*, 2012, **58**, 227–235.
- 4 C. Oses, E. Gossett, D. Hicks, F. Rose, M. J. Mehl, E. Perim, I. Takeuchi, S. Sanvito, M. Scheffler, Y. Lederer, O. Levy, C. Toher and S. Curtarolo, AFLOW-CHULL: Cloud-Oriented Platform for Autonomous Phase Stability Analysis, *J. Chem. Inf. Model.*, 2018, **58**, 2477–2490.
